# Supplementary material for: Injectable, stretchable, toughened, bioadhesive composite hydrogel for bladder injury repair
Source: Royal Society of Chemistry journal article supplement (doi:10.1039/d3ra00402c), 2023-01-01
Supplement: d3ra00402c1.pdf [file d3ra00402c1.pdf]

## Supplementary Information

### **Injectable, Stretchable, Toughened, Bioadhesive Composite Hydrogel For Bladder Injury Repair**

Zhouyang Fu,<sup>ab</sup> Shuwei Xiao<sup>ad</sup> Pengchao Wang,<sup>bc</sup> Jian Zhao,<sup>ab</sup> Zhengyun Ling,<sup>ab</sup>  
Ziyan An,<sup>ab</sup> Jinpeng Shao<sup>ab</sup> and Weijun Fu<sup>\*a</sup>

<sup>a</sup>Department of Urology, the Third Medical Centre, Chinese PLA General Hospital, Beijing, 100853, China.

<sup>b</sup>Medical School of Chinese PLA, Beijing, 100853, China.

<sup>c</sup>Department of Urology, Hainan Hospital of PLA General Hospital, Hainan, 572013, China.

<sup>d</sup>Department of Urology, Air Force Medical Center, Beijing, 100142, China.

**\*Corresponding author:** Weijun Fu. Email: fuweijun@hotmail.com

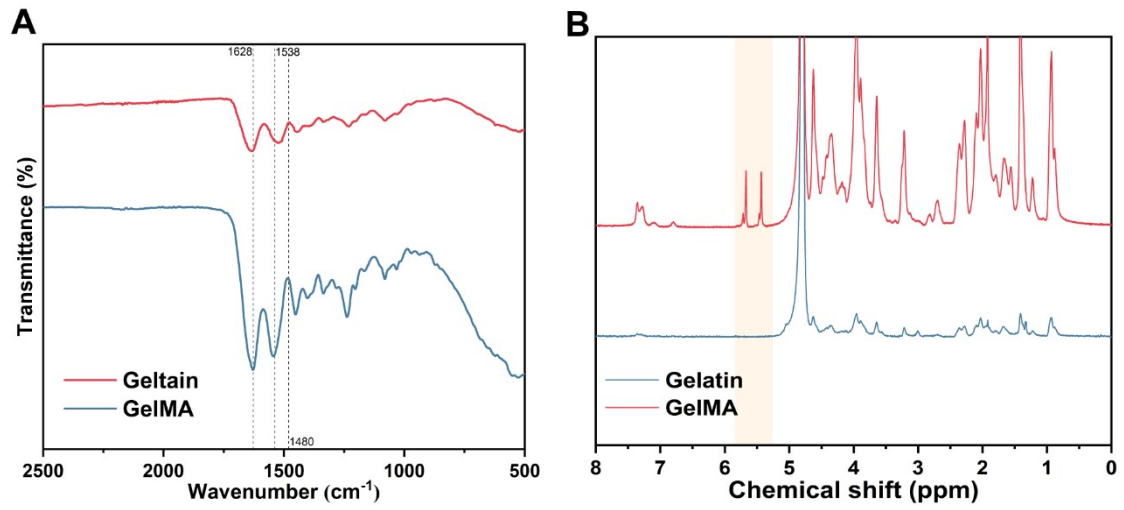

**Fig. S1** (A) FTIR and (B)  $^1\text{H}$  NMR spectra of gelatine and GelMA.

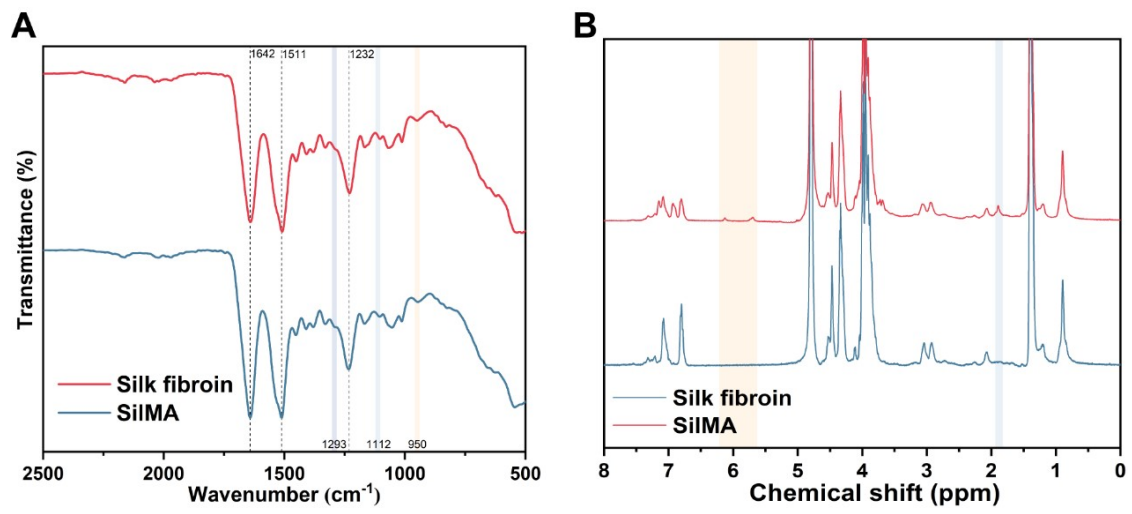

**Fig. S2** (A) FTIR and (B)  $^1\text{H}$  NMR spectra of silk protein and SiIMA.

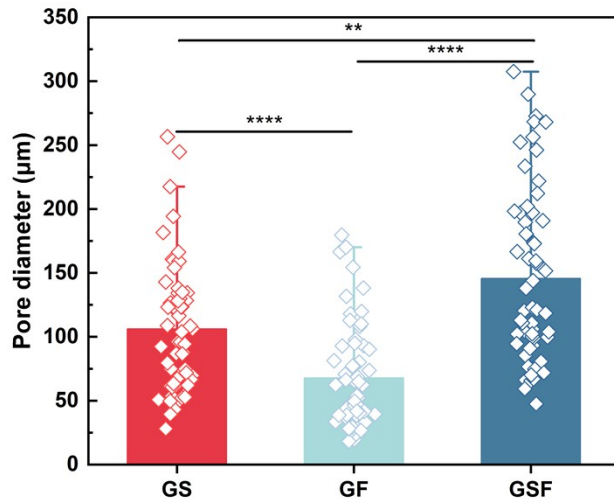

**Fig. S3** Pore diameter of the lyophilised GS, GF, and GSF hydrogels.

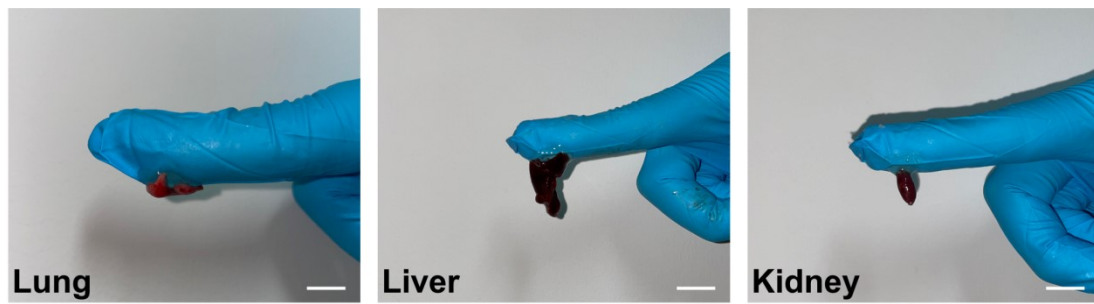

**Fig. S4** Photographs of the GSF hydrogel adhered to the lung, liver and kidney of mice; scale bar = 10 mm.
